# Supplementary material for: Mapping the interactome of overexpressed RAF kinase inhibitor protein in a gastric cancer cell line
Source: BMC Cancer. 2013 Nov 9;13:536. doi: 10.1186/1471-2407-13-536 (PMC3830446; doi:10.1186/1471-2407-13-536)
Supplement: Additional file 1: Table S1 — MS/MS identification of proteins that interact with RKIP. [file 1471-2407-13-536-S1.xls]

## Sheet: Sheet1
Table S1. MS/MS Identification of Proteins That Interact with RKIP
Uniport ID	Protein name	Protein accession numbers	Database sources	Protein molecular weight (Da)	Mascot protein Score	Protein identification probability	Number of unique peptides	Number of unique spectra	Number of total spectra	Percentage of total spectra	Percentage sequence coverage	Peptide sequence	Mascot Ion score	Mascot Identity score	Number of enzymatic termini	Calculated [M+H]+1 ion Mass (AMU)
P53618	Coatomer subunit beta	IPI00295851	ipi.HUMAN.v3.68.fasta	107128	89	0.997	2	2	3	0.0151	0.0336	LVTEMGTYATQSALSSSRPTK	45	32.6	2	2228.12
						0.997	2	2	3	0.0151	0.0336	VLQDLVMDILR	34.8	34.8	2	1314.75
P14618	Pyruvate kinase isozymes M1/M2, isoform M2	IPI00479186,IPI00910979	ipi.HUMAN.v3.68.fasta	57919.5	604	0.998	2	2	2	0.0124	0.0716	FGVEQDVDMVFASFIR	38.3	33.6	2	1859.9
						0.998	2	2	2	0.0124	0.0716	LAPITSDPTEATAVGAVEASFK	41.3	32.5	2	2175.12
						1	6	8	30	0.184	0.19	EAEAAIYHLQLFEELRR	28.1	32.8	2	2088.09
						1	6	8	30	0.184	0.19	FGVEQDVDMVFASFIR	70.3	33.5	2	1859.9
						1	6	8	30	0.184	0.19	FGVEQDVDMVFASFIRK	49.3	32.8	2	1988
						1	6	8	30	0.184	0.19	GDLGIEIPAEKVFLAQK	34.5	33.6	2	1828.02
						1	6	8	30	0.184	0.19	LAPITSDPTEATAVGAVEASFK	109	32.4	2	2175.12
						1	6	8	30	0.184	0.19	TATESFASDPILYRPVAVALDTKGPEIR	51	31.1	2	3017.6
P00966	Argininosuccinate synthase	IPI00020632	ipi.HUMAN.v3.68.fasta	50800.3	142	1	5	6	6	0.0259	0.211	APNTPDILEIEFKK	47.6	34.2	2	1614.87
						1	5	6	6	0.0259	0.211	DGTTHQTSLELFMYLNEVAGK	47	32	2	2354.13
						1	5	6	6	0.0259	0.211	IDIVENRFIGMK	53.7	34.5	2	1434.78
						1	5	6	6	0.0259	0.211	NPWSMDENLMHISYEAGILENPKNQAPPGLYTK	25.2	28.8	2	3757.8
						1	5	6	6	0.0259	0.211	VQVSVLKGQVYILGR	71.3	33.7	2	1659
P00558	Phosphoglycerate kinase 1	IPI00169383,IPI00910974,IPI00916818	ipi.HUMAN.v3.68.fasta	44597.3	102	0.998	2	2	2	0.00862	0.0839	ALESPERPFLAILGGAK	43	33.7	2	1769
						0.998	2	2	2	0.00862	0.0839	VLNNMEIGTSLFDEEGAK	65.8	33.4	2	1982.94
P08195	4F2 cell-surface antigen heavy chain, isoform 2	IPI00027493,IPI00554481,IPI00554611,IPI00554702,IPI00554722,IPI00604710	ipi.HUMAN.v3.68.fasta	57929.4	56	0.998	2	2	2	0.0103	0.0491	GQSEDPGSLLSLFR	55.5	34.4	2	1505.76
						0.998	2	2	2	0.0103	0.0491	LLTSFLPAQLLR	44.4	34.6	2	1371.84
P06733	Alpha-enolase	IPI00465248	ipi.HUMAN.v3.68.fasta	47152.2	517	1	11	13	21	0.0837	0.44	AAVPSGASTGIYEALELR	82.5	33.7	2	1804.94
						1	11	13	21	0.0837	0.44	AGYTDKVVIGMDVAASEFFR	84.7	32.8	2	2176.07
						1	11	13	21	0.0837	0.44	DATNVGDEGGFAPNILENKEGLELLK	33.8	31	2	2743.38
						1	11	13	21	0.0837	0.44	EIFDSRGNPTVEVDLFTSK	39.4	32.4	2	2154.07
						1	11	13	21	0.0837	0.44	FTASAGIQVVGDDLTVTNPKR	88.4	32.4	2	2189.16
						1	11	13	21	0.0837	0.44	GNPTVEVDLFTSK	44	34.5	2	1406.72
						1	11	13	21	0.0837	0.44	HIADLAGNSEVILPVPAFNVINGGSHAGNK	49.2	30.9	2	3011.57
						1	11	13	21	0.0837	0.44	IGAEVYHNLKNVIK	45.5	33.9	2	1597.91
						1	11	13	21	0.0837	0.44	LAMQEFMILPVGAANFR	56.4	33.3	2	1923.98
						1	11	13	21	0.0837	0.44	YISPDQLADLYK	54.5	34.6	2	1425.73
						1	11	13	21	0.0837	0.44	YNQLLRIEEELGSK	49.7	34.2	2	1691.9
P04406	Glyceraldehyde-3-phosphate dehydrogenase	IPI00219018,IPI00795257	ipi.HUMAN.v3.68.fasta	36035.3	769	1	8	10	50	0.231	0.37	DGRGALQNIIPASTGAAK	62.6	33.4	2	1739.94
						1	8	10	50	0.231	0.37	GALQNIIPASTGAAK	55	34.4	2	1411.79
						1	8	10	50	0.231	0.37	IKWGDAGAEYVVESTGVFTTMEK	33.3	31.5	2	2518.22
						1	8	10	50	0.231	0.37	LISWYDNEFGYSNR	72.8	34	2	1763.8
						1	8	10	50	0.231	0.37	LVINGNPITIFQERDPSK	29.4	33	2	2041.11
						1	8	10	50	0.231	0.37	VIHDNFGIVEGLMTTVHAITATQK	55.5	31.8	2	2595.36
						1	8	10	50	0.231	0.37	VIISAPSADAPMFVMGVNHEKYDNSLK	31.8	31	2	2933.45
						1	8	10	50	0.231	0.37	WGDAGAEYVVESTGVFTTMEK	56.5	32.3	2	2277.04
P07195	L-lactate dehydrogenase B chain	IPI00219217	ipi.HUMAN.v3.68.fasta	36620.6	74	0.991	2	2	3	0.0139	0.0808	LIAPVAEEEATVPNNK	60.1	33.7	2	1694.9
						0.991	2	2	3	0.0139	0.0808	MVVESAYEVIK	29	34.6	2	1267.66
P00338	L-lactate dehydrogenase A chain, isoform 1	IPI00217966,IPI00607708,IPI00908791,IPI00939286,IPI00947127	ipi.HUMAN.v3.68.fasta	36671.2	43	0.998	2	2	2	0.00985	0.0934	LLIVSNPVDILTYVAWK	47.5	33.1	2	1944.12
						0.998	2	2	2	0.00985	0.0934	SADTLWGIQKELQF	37.9	33.8	2	1635.84
P40926	Malate dehydrogenase, mitochondrial	IPI00291006	ipi.HUMAN.v3.68.fasta	35485.7	49	0.998	2	2	2	0.00985	0.0888	IFGVTTLDIVR	44.6	35.1	2	1233.72
						0.998	2	2	2	0.00985	0.0888	VAVLGASGGIGQPLSLLLK	37.3	33.7	2	1793.09
P46940	Ras GTPase-activating-like protein IQGAP1	IPI00009342	ipi.HUMAN.v3.68.fasta	189241	55	0.991	2	2	2	0.0909	0.0187	LAAVALINAAIQK	47.3	34.5	2	1295.81
						0.991	2	2	2	0.0909	0.0187	LEGVLAEVAQHYQDTLIR	31.6	32.7	2	2055.09
P68104	Elongation factor 1-alpha 1	IPI00396485,IPI00472724	ipi.HUMAN.v3.68.fasta	50123.2	190	1	5	7	10	0.0398	0.149	EHALLAYTLGVK	66.8	34.8	2	1314.74
						1	5	7	10	0.0398	0.149	NGQTREHALLAYTLGVK	36	33.4	2	1871.01
						1	5	7	10	0.0398	0.149	THINIVVIGHVDSGK	40.3	34.5	2	1588.88
						1	5	7	10	0.0398	0.149	VETGVLKPGMVVTFAPVNVTTEVK	43.2	31.6	2	2515.38
						1	5	7	10	0.0398	0.149	YEEIVKEVSTYIK	57.4	33.8	2	1600.85
P02786	Transferrin receptor protein 1	IPI00022462	ipi.HUMAN.v3.68.fasta	84855.6	74	0.998	2	2	2	0.0101	0.0382	SAFSNLFGGEPLSYTR	67.6	33.8	2	1745.85
						0.998	2	2	2	0.0101	0.0382	VSASPLLYTLIEK	36.1	34.7	2	1433.83
P14625	Endoplasmin	IPI00027230	ipi.HUMAN.v3.68.fasta	92453.7	192	1	7	8	10	0.0503	0.139	ELISNASDALDKIR	71.4	34.4	2	1544.83
						1	7	8	10	0.0503	0.139	FQSSHHPTDITSLDQYVER	50.6	32.3	2	2260.06
						1	7	8	10	0.0503	0.139	GVVDSDDLPLNVSR	60.4	34.7	2	1485.76
						1	7	8	10	0.0503	0.139	KYSQFINFPIYVWSSK	33.6	33	2	2007.04
						1	7	8	10	0.0503	0.139	LISLTDENALSGNEELTVK	23.5	32.8	2	2046.06
						1	7	8	10	0.0503	0.139	NLLHVTDTGVGMTREELVK	31.3	32.8	2	2112.11
						1	7	8	10	0.0503	0.139	SILFVPTSAPR	43.8	35.4	2	1187.68
						1	7	8	10	0.0503	0.139	YSQFINFPIYVWSSK	35.7	33.5	2	1878.94
P07900	Heat shock protein HSP 90-alpha, isoform 2	IPI00382470,IPI00784295	ipi.HUMAN.v3.68.fasta	98147.1	280	1	4	5	7	0.0654	0.191	SLTNDWEDHLAVK	47.3	34.1	2	1527.74
						1	4	5	7	0.0654	0.191	TLTIVDTGIGMTK	58.1	35.4	2	1349.74
						1	4	5	7	0.0654	0.191	VILHLKEDQTEYLEER	64.1	33	2	2015.05
						1	4	5	7	0.0654	0.191	YIDQEELNKTKPIWTR	33.6	32.9	2	2034.07
P08238	Heat shock protein HSP 90-beta	IPI00414676	ipi.HUMAN.v3.68.fasta	83249.3	276	1	11	12	20	0.187	0.231	ADLINNLGTIAK	38.1	35.3	2	1242.71
						1	11	12	20	0.187	0.231	GVVDSEDLPLNISR	98.5	34.4	2	1513.79
						1	11	12	20	0.187	0.231	HFSVEGQLEFR	28.3	35.5	2	1348.66
						1	11	12	20	0.187	0.231	HLEINPDHPIVETLR	36.6	33.8	2	1782.95
						1	11	12	20	0.187	0.231	HSQFIGYPITLYLEKER	59	33.3	2	2094.1
						1	11	12	20	0.187	0.231	SIYYITGESKEQVANSAFVER	32.6	32	2	2391.18
						1	11	12	20	0.187	0.231	SLTNDWEDHLAVK	47.3	34.1	2	1527.74
						1	11	12	20	0.187	0.231	TLTLVDTGIGMTK	58.1	35.4	2	1349.74
						1	11	12	20	0.187	0.231	VILHLKEDQTEYLEER	64.1	33	2	2015.05
						1	11	12	20	0.187	0.231	YHTSQSGDEMTSLSEYVSR	23.9	33	2	2176.95
						1	11	12	20	0.187	0.231	YIDQEELNKTKPIWTR	33.6	32.9	2	2034.07
P11142	Heat shock cognate 71 kDa protein , isoform 1	IPI00003865,IPI00037070,IPI00939595	ipi.HUMAN.v3.68.fasta	70881.8	398	1	6	7	14	0.087	0.115	ARFEELNADLFR	58.9	34.2	2	1480.75
						1	6	7	14	0.087	0.115	IINEPTAAAIAYGLDK	81.8	34.1	2	1659.9
						1	6	7	14	0.087	0.115	IINEPTAAAIAYGLDKK	90.6	34.3	2	1787.99
						1	6	7	14	0.087	0.115	LLQDFFNGKELNK	39.3	34.3	2	1565.83
						1	6	7	14	0.087	0.115	SFYPEEVSSMVLTK	53.9	34.3	2	1616.79
						1	6	7	14	0.087	0.115	TVTNAVVTVPAYFNDSQR	77.8	32.8	2	1982
P38646	Stress-70 protein, mitochondrial	IPI00007765	ipi.HUMAN.v3.68.fasta	73663.3	253	1	4	4	7	0.0435	0.0677	AQFEGIVTDLIR	54.4	34.9	2	1361.74
						1	4	4	7	0.0435	0.0677	AQFEGIVTDLIRR	21.9	34.1	2	1517.84
						1	4	4	7	0.0435	0.0677	LYSPSQIGAFVLMK	73	34.2	2	1553.84
						1	4	4	7	0.0435	0.0677	STNGDTFLGGEDFDQALLR	95.9	32.7	2	2055.96
P10809	60 kDa heat shock protein, mitochondrial	IPI00784154	ipi.HUMAN.v3.68.fasta	61037.7	723	1	8	11	19	0.117	0.246	ALMLQGVDLLADAVAVTMGPK	121	32.7	2	2129.14
						1	8	11	19	0.117	0.246	GVMLAVDAVIAELKK	77.6	34.2	2	1556.91
						1	8	11	19	0.117	0.246	IMQSSSEVGYDAMAGDFVNMVEK	74.8	31.5	2	2508.11
						1	8	11	19	0.117	0.246	ISSIQSIVPALEIANAHR	58.8	33.5	2	1919.07
						1	8	11	19	0.117	0.246	KISSIQSIVPALEIANAHR	36.5	33.1	2	2047.17
						1	8	11	19	0.117	0.246	KPLVIIAEDVDGEALSTLVLNR	49.6	31.9	2	2365.33
						1	8	11	19	0.117	0.246	LVQDVANNTNEEAGDGTTTATVLAR	44.5	32	2	2560.25
						1	8	11	19	0.117	0.246	TLNDELEIIEGMKFDR	53.2	33.3	2	1922.95
P53992	Protein transport protein Sec24C	IPI00024661	ipi.HUMAN.v3.68.fasta	118307	61	1	3	3	3	0.0154	0.0484	AVITSLLDQIPEMFADTR	44.6	32.8	2	2020.04
						1	3	3	3	0.0154	0.0484	LPPEEASPYVVDHGESGPLR	31.7	32.5	2	2149.06
						1	3	3	3	0.0154	0.0484	QAQVPLAAVIKPLAR	46.5	34.1	2	1574.97
P50454	Serpin H1	IPI00032140	ipi.HUMAN.v3.68.fasta	46424	133	1	3	3	3	0.012	0.151	AVLSAEQLRDEEVHAGLGELLR	37.2	32.4	2	2405.28
						1	3	3	3	0.012	0.151	DQAVENILVSPVVVASSLGLVSLGGK	54.5	32	2	2551.43
						1	3	3	3	0.012	0.151	LYGPSSVSFADDFVR	87.1	34.1	2	1659.8
O00299	Chloride intracellular channel protein 1	IPI00010896	ipi.HUMAN.v3.68.fasta	26905.3	78	0.993	2	2	3	0.0161	0.187	LAALNPESNTAGLDIFAK	99.7	33.4	2	1844.98
						0.993	2	2	3	0.0161	0.187	VLDNYLTSPLPEEVDETSAEDEGVSQR	32	30.7	2	2992.39
Q06830	Peroxiredoxin-1	IPI00000874,IPI00640741	ipi.HUMAN.v3.68.fasta	22092.9	51	0.999	3	4	4	0.028	0.236	GLFIIDDKGILR	50.7	35	2	1359.8
						0.999	3	4	4	0.028	0.236	QGGLGPMNIPLVSDPKR	21.9	33.3	2	1778.96
						0.999	3	4	4	0.028	0.236	TIAQDYGVLKADEGISFR	45.8	33.4	2	1983.02
O43390	Heterogeneous nuclear ribonucleoprotein R, isoform 1	IPI00012074,IPI00644055,IPI00856037,IPI00856038,IPI00910614,IPI00941649	ipi.HUMAN.v3.68.fasta	70925.8	63	0.998	2	2	2	0.0124	0.0411	DLYEDELVPLFEK	38.2	33.9	2	1609.8
						0.998	2	2	2	0.0124	0.0411	NLATTVTEEILEK	55.9	34.7	2	1460.79
P52597	Heterogeneous nuclear ribonucleoprotein F	IPI00003881	ipi.HUMAN.v3.68.fasta	45653.8	110	0.998	2	2	2	0.00797	0.0819	ATENDIYNFFSPLNPVR	71	33.2	2	1996.98
						0.998	2	2	2	0.00797	0.0819	ITGEAFVQFASQELAEK	74.8	33.2	2	1867.94
P04083	Annexin A1	IPI00218918	ipi.HUMAN.v3.68.fasta	38697.9	454	1	9	12	20	0.0985	0.373	ALTGHLEEVVLALLK	62.8	33.9	2	1605.96
						1	9	12	20	0.0985	0.373	DITSDTSGDFRNALLSLAK	32.6	33.1	2	2024.03
						1	9	12	20	0.0985	0.373	GDRSEDFGVNEDLADSDAR	65.4	32.7	2	2067.89
						1	9	12	20	0.0985	0.373	GLGTDEDTLIEILASR	80.7	33.7	2	1702.89
						1	9	12	20	0.0985	0.373	GTDVNVFNTILTTR	73.6	34.4	2	1550.82
						1	9	12	20	0.0985	0.373	GVDEATIIDILTK	66.1	34.3	2	1387.77
						1	9	12	20	0.0985	0.373	GVDEATIIDILTKR	69.7	34.2	2	1543.87
						1	9	12	20	0.0985	0.373	QAWFIENEEQEYVQTVK	58.7	33	2	2141.02
						1	9	12	20	0.0985	0.373	TPAQFDADELRAAMK	22.5	34	2	1663.81
P12429	Annexin A3	IPI00024095,IPI00745868	ipi.HUMAN.v3.68.fasta	36359.4	53	1	3	3	3	0.017	0.111	DYPDFSPSVDAEAIQK	34.5	33.8	2	1781.82
						1	3	3	3	0.017	0.111	GAGTNEDALIEILTTR	70.5	34.2	2	1673.87
						1	3	3	3	0.017	0.111	GTVRDYPDFSPSVDAEAIQK	31.3	32.7	2	2195.06
P08758	Annexin A5	IPI00329801,IPI00872379	ipi.HUMAN.v3.68.fasta	35920.6	50	1	4	4	7	0.0398	0.162	GLGTDEESILTLLTSR	65.8	33.8	2	1704.9
						1	4	4	7	0.0398	0.162	NFATSLYSMIK	21	35.1	2	1274.65
						1	4	4	7	0.0398	0.162	SEIDLFNIRK	39	35.2	2	1234.68
						1	4	4	7	0.0398	0.162	SIPAYLAETLYYAMK	38.1	33.6	2	1733.88
P62258	14-3-3 protein epsilon	IPI00000816,IPI00793344	ipi.HUMAN.v3.68.fasta	29157	136	0.998	2	3	6	0.0323	0.118	AASDIAMTELPPTHPIR	55.8	34	2	1819.94
						0.998	2	3	6	0.0323	0.118	VAGMDVELTVEER	70.3	34.4	2	1463.71
P23396	40S ribosomal protein S3	IPI00011253,IPI00939811	ipi.HUMAN.v3.68.fasta	26670.5	122	1	4	4	7	0.0376	0.296	FGFPEGSVELYAEK	46.9	34.6	2	1572.76
						1	4	4	7	0.0376	0.296	FVDGLMIHSGDPVNYYVDTAVR	23.4	31.8	2	2468.19
						1	4	4	7	0.0376	0.296	IMLPWDPTGK	36.8	35.5	2	1173.6
						1	4	4	7	0.0376	0.296	KPLPDHVSIVEPKDEILPTTPISEQK	59.4	31.1	2	2910.58
Q99623	Prohibitin-2	IPI00027252,IPI00797822	ipi.HUMAN.v3.68.fasta	33279.6	38	1	4	4	4	0.0227	0.204	IGGVQQDTILAEGLHFR	50.3	33.8	2	1853.99
						1	4	4	4	0.0227	0.204	IPWFQYPIIYDIR	30.4	33.9	2	1723.92
						1	4	4	4	0.0227	0.204	ISSPTGSKDLQMVNISLR	23	33.6	2	1946.04
						1	4	4	4	0.0227	0.204	LLLGAGAVAYGVR	37.4	34.8	2	1259.75
O75369	Filamin-B, isoform 1	IPI00289334,IPI00382697,IPI00477536,IPI00900293,IPI00940093,IPI00943563,IPI00945610,IPI00953109,IPI00953286	ipi.HUMAN.v3.68.fasta	278172	91	1	7	7	7	0.25	0.0461	IFFAGDTIPK	16.2	35	2	1108.6
						1	7	7	7	0.25	0.0461	LVSPGSANETSSILVESVTR	40.4	32.8	2	2046.07
						1	7	7	7	0.25	0.0461	SPFTVGVAAPLDLSK	58	34.3	2	1501.83
						1	7	7	7	0.25	0.0461	TFEMSDFIVDTR	47.4	34.7	2	1460.67
						1	7	7	7	0.25	0.0461	VLFASQEIPASPFR	25.5	34.1	2	1561.84
						1	7	7	7	0.25	0.0461	VQAQGPGLKEAFTNKPNVFTVVTR	16.2	31.2	2	2601.42
						1	7	7	7	0.25	0.0461	YRGQHVTGSPFQFTVGPLGEGGAHK	12.5	30.9	2	2627.31
P21333	Filamin-A, isoform 2	IPI00302592,IPI00333541,IPI00644576	ipi.HUMAN.v3.68.fasta	279991	91	1	5	5	5	0.227	0.0307	EGPYSISVLYGDEEVPR	39.5	33.2	2	1909.92
						1	5	5	5	0.227	0.0307	GLVEPVDVVDNADGTQTVNYVPSR	16.2	31.7	2	2544.26
						1	5	5	5	0.227	0.0307	IANLQTDLSDGLR	26.9	34.4	2	1415.75
						1	5	5	5	0.227	0.0307	SPFSVAVSPSLDLSK	40	34.4	2	1533.82
						1	5	5	5	0.227	0.0307	YGGDEIPFSPYR	17.2	34.5	2	1400.65
P18206	Vinculin, isoform 1	IPI00291175,IPI00307162	ipi.HUMAN.v3.68.fasta	116706	668	1	15	15	21	0.108	0.215	AIPDLTAPVAAVQAAVSNLVR	70.6	32.8	2	2076.18
						1	15	15	21	0.108	0.215	ALASQLQDSLKDLK	76	34.4	2	1529.85
						1	15	15	21	0.108	0.215	AQQVSQGLDVLTAK	47.6	34.4	2	1457.8
						1	15	15	21	0.108	0.215	AQQVSQGLDVLTAKVENAAR	68.7	32.9	2	2098.13
						1	15	15	21	0.108	0.215	GILSGTSDLLLTFDEAEVR	83.3	33	2	2036.06
						1	15	15	21	0.108	0.215	GILSGTSDLLLTFDEAEVRK	53.2	33	2	2164.15
						1	15	15	21	0.108	0.215	GWLRDPSASPGDAGEQAIR	43.1	33.4	2	1982.97
						1	15	15	21	0.108	0.215	LANVMMGPYRQDLLAK	19.2	33.3	2	1851.95
						1	15	15	21	0.108	0.215	MALLMAEMSR	62.8	35.1	2	1152.56
						1	15	15	21	0.108	0.215	MLGQMTDQVADLR	88.1	34.7	2	1477.71
						1	15	15	21	0.108	0.215	MQEAMTQEVSDVFSDTTTPIK	61.5	32.1	2	2358.08
						1	15	15	21	0.108	0.215	MSAEINEIIR	55.4	35.3	2	1175.61
						1	15	15	21	0.108	0.215	TNISDEESEQATEMLVHNAQNLMQSVK	19.8	30.3	2	3062.4
						1	15	15	21	0.108	0.215	VAMANIQPQMLVAGATSIAR	52.7	32.9	2	2042.09
						1	15	15	21	0.108	0.215	WIDNPTVDDRGVGQAAIR	33.8	33.4	2	1983.01
P04264	Keratin, type II cytoskeletal 1	IPI00220327	ipi.HUMAN.v3.68.fasta	66022.3	89	1	4	4	4	0.0333	0.0823	SGGGFSSGSAGIINYQR	31.9	33.9	2	1657.79
						1	4	4	4	0.0333	0.0823	SLDLDSIIAEVK	63.3	34.8	2	1302.72
						1	4	4	4	0.0333	0.0823	SLNNQFASFIDK	27.2	34.9	2	1383.69
						1	4	4	4	0.0333	0.0823	WELLQQVDTSTR	38.4	34.5	2	1475.75
P05787	Keratin, type II cytoskeletal 8	IPI00554648	ipi.HUMAN.v3.68.fasta	53688.2	156	1	7	8	9	0.0346	0.188	ASLEAAIADAEQRGELAIK	50	32.9	2	1956.04
						1	7	8	9	0.0346	0.188	LALDIEIATYRK	51.8	34.5	2	1405.81
						1	7	8	9	0.0346	0.188	LEGLTDEINFLR	69.3	34.6	2	1419.75
						1	7	8	9	0.0346	0.188	QLREYQELMNVK	38.2	34.4	2	1550.8
						1	7	8	9	0.0346	0.188	SLDMDSIIAEVK	52.5	35	2	1320.67
						1	7	8	9	0.0346	0.188	SLDMDSIIAEVKAQYEDIANR	79.7	31.7	2	2381.17
						1	7	8	9	0.0346	0.188	SNMDNMFESYINNLR	37.2	33.5	2	1847.81
Q04695	Keratin, type I cytoskeletal 17	IPI00450768	ipi.HUMAN.v3.68.fasta	48088.7	221	1	4	5	7	0.0279	0.167	ADLEMQIENLKEELAYLK	48.3	32.5	2	2166.1
						1	4	5	7	0.0279	0.167	ALEEANTELEVK	47.9	34.8	2	1345.69
						1	4	5	7	0.0279	0.167	TIEELQNKILTATVDNANILLQIDNAR	71.3	30.3	2	3023.64
						1	4	5	7	0.0279	0.167	TIVEEVQDGKVISSR	68.8	34.1	2	1659.89
P05783	Keratin, type I cytoskeletal 18	IPI00554788	ipi.HUMAN.v3.68.fasta	48041	547	1	11	15	23	0.0991	0.523	ASLENSLREVEAR	35.2	34.6	2	1473.77
						1	11	15	23	0.0991	0.523	GGMGSGGLATGIAGGLAGMGGIQNEKETMQSLNDR	48.4	29.4	2	3367.57
						1	11	15	23	0.0991	0.523	IIEDLRAQIFANTVDNAR	66.7	33	2	2059.09
						1	11	15	23	0.0991	0.523	LLEDGEDFNLGDALDSSNSMQTIQK	75.4	31.1	2	2740.26
						1	11	15	23	0.0991	0.523	LQLETEIEALKEELLFMK	60.9	32.6	2	2177.18
						1	11	15	23	0.0991	0.523	NHEEEVKGLQAQIASSGLTVEVDAPK	89.5	30.7	2	2749.4
						1	11	15	23	0.0991	0.523	QAQEYEALLNIK	62.9	34.6	2	1419.75
						1	11	15	23	0.0991	0.523	SLGSVQAPSYGARPVSSAASVYAGAGGSGSR	27.3	31.4	2	2854.41
						1	11	15	23	0.0991	0.523	TVQSLEIDLDSMR	59.8	34.1	2	1506.75
						1	11	15	23	0.0991	0.523	VKLEAEIATYR	31.6	35.2	2	1292.72
						1	11	15	23	0.0991	0.523	YALQMEQLNGILLHLESELAQTR	57.2	31.6	2	2670.39
Q15149	Plectin-1, isoform 1	IPI00014898,IPI00186711,IPI00398002,IPI00398775,IPI00398776,IPI00398777,IPI00398778,IPI00398779,IPI00420096	ipi.HUMAN.v3.68.fasta	531766	73	1	4	5	5	0.0909	0.0147	AGLVGPEFHEKLLSAEK	16.2	33.3	2	1824.99
						1	4	5	5	0.0909	0.0147	AYSDPSTGEPATYGELQQR	44.3	32.7	2	2069.94
						1	4	5	5	0.0909	0.0147	LQEAGILSAEELQR	35.9	34.2	2	1556.83
						1	4	5	5	0.0909	0.0147	LQLEETDHQKNLLDEELQR	34.8	32.2	2	2351.18
P35579	Myosin-9, isoform 1	IPI00019502	ipi.HUMAN.v3.68.fasta	226520	62	1	6	6	6	0.115	0.049	HSQAVEELAEQLEQTKR	40.8	33.1	2	1996.01
						1	6	6	6	0.115	0.049	LDPHLVLDQLR	19.7	35	2	1318.75
						1	6	6	6	0.115	0.049	LQQELDDLLVDLDHQR	39.6	33.2	2	1949.99
						1	6	6	6	0.115	0.049	LQVELDNVTGLLSQSDSK	21.7	33	2	1946.01
						1	6	6	6	0.115	0.049	QLLQANPILEAFGNAK	17.3	33.5	2	1726.95
						1	6	6	6	0.115	0.049	SMEAEMIQLQEELAAAER	28.6	33	2	2048.96
P68371	Tubulin beta-2C chain	IPI00007752	ipi.HUMAN.v3.68.fasta	49812.7	245	0.997	2	2	2	0.00769	0.333	ALTVPELTQQMFDAK	47.6	34.1	2	1691.87
						0.997	2	2	2	0.00769	0.333	AVLVDLEPGTMDSVR	37.1	33.9	2	1617.82
						0.997	2	2	2	0.00769	0.333	GHYTEGAELVDSVLDVVR	116	32.9	2	1958.98
						0.997	2	2	2	0.00769	0.333	GHYTEGAELVDSVLDVVRK	87.8	32.5	2	2087.08
						0.997	2	2	2	0.00769	0.333	IMNTFSVVPSPK	78.3	35.1	2	1319.7
						0.997	2	2	2	0.00769	0.333	ISEQFTAMFR	40.6	35.3	2	1229.6
						0.997	2	2	2	0.00769	0.333	KLAVNMVPFPR	30	35	2	1271.73
						0.997	2	2	2	0.00769	0.333	LAVNMVPFPR	33.2	35.7	2	1143.63
						0.997	2	2	2	0.00769	0.333	LHFFMPGFAPLTSR	36.2	34	2	1620.84
						0.997	2	2	2	0.00769	0.333	MSMKEVDEQMLNVQNK	31.5	33.3	2	1923.9
						0.997	2	2	2	0.00769	0.333	RISEQFTAMFR	25.9	34.6	2	1385.7
						0.997	2	2	2	0.00769	0.333	SGPFGQIFRPDNFVFGQSGAGNNWAK	64.7	31.3	2	2798.34
						0.997	2	2	2	0.00769	0.333	YLTVAAVFR	35.5	35.1	2	1039.59
P07437	Tubulin beta chain	IPI00645452	ipi.HUMAN.v3.68.fasta	47748.5	309	1	15	17	21	0.0808	0.415	AILVDLEPGTMDSVR	56.1	34.4	2	1615.84
						1	15	17	21	0.0808	0.415	ALTVPELTQQVFDAK	55.5	34	2	1659.9
						1	15	17	21	0.0808	0.415	GHYTEGAELVDSVLDVVR	116	32.9	2	1958.98
						1	15	17	21	0.0808	0.415	GHYTEGAELVDSVLDVVRK	87.8	32.5	2	2087.08
						1	15	17	21	0.0808	0.415	IMNTFSVVPSPK	78.3	35.1	2	1319.7
						1	15	17	21	0.0808	0.415	ISEQFTAMFR	40.6	35.3	2	1229.6
						1	15	17	21	0.0808	0.415	ISVYYNEATGGK	54.5	34.7	2	1301.64
						1	15	17	21	0.0808	0.415	KLAVNMVPFPR	30	35	2	1271.73
						1	15	17	21	0.0808	0.415	LAVNMVPFPR	33.2	35.7	2	1143.63
						1	15	17	21	0.0808	0.415	LHFFMPGFAPLTSR	36.2	34	2	1620.84
						1	15	17	21	0.0808	0.415	MAVTFIGNSTAIQELFKR	76.2	33.1	2	2026.08
						1	15	17	21	0.0808	0.415	MSMKEVDEQMLNVQNK	31.5	33.3	2	1923.9
						1	15	17	21	0.0808	0.415	RISEQFTAMFR	25.9	34.6	2	1385.7
						1	15	17	21	0.0808	0.415	SGPFGQIFRPDNFVFGQSGAGNNWAK	64.7	31.3	2	2798.34
						1	15	17	21	0.0808	0.415	YLTVAAVFR	35.5	35.1	2	1039.59
P60709	Actin, cytoplasmic 1	IPI00021439,IPI00021440,IPI00894498	ipi.HUMAN.v3.68.fasta	41719.8	617	1	5	7	22	0.0948	0.264	DLYANTVLSGGTTMYPGIADR	88.2	32.6	2	2215.07
						1	5	7	22	0.0948	0.264	LDLAGRDLTDYLMK	46.3	33.9	2	1623.84
						1	5	7	22	0.0948	0.264	SYELPDGQVITIGNER	91.6	33.5	2	1790.89
						1	5	7	22	0.0948	0.264	TTGIVMDSGDGVTHTVPIYEGYALPHAILR	75.4	30.2	2	3183.62
						1	5	7	22	0.0948	0.264	VAPEEHPVLLTEAPLNPK	40.9	33	2	1954.07
P52907	F-actin-capping protein subunit alpha-1	IPI00005969,IPI00873484	ipi.HUMAN.v3.68.fasta	32905.1	61	0.996	2	2	2	0.00926	0.0979	FITHAPPGEFNEVFNDVR	36.9	32.9	2	2089.01
						0.996	2	2	2	0.00926	0.0979	LLLNNDNLLR	58.2	34.9	2	1197.7
P04075	Fructose-bisphosphate aldolase A	IPI00465439,IPI00796333	ipi.HUMAN.v3.68.fasta	39402.6	141	0.999	3	3	4	0.0276	0.173	GVVPLAGTNGETTTQGLDGLSER	74	32.7	2	2272.14
						0.999	3	3	4	0.0276	0.173	IGEHTPSALAIMENANVLAR	56.7	33.3	2	2107.1
						0.999	3	3	4	0.0276	0.173	IVAPGKGILAADESTGSIAK	22.3	33.2	2	1898.06
P08670	Vimentin	IPI00418471	ipi.HUMAN.v3.68.fasta	53634.6	574	0.998	2	3	16	0.111	0.0579	ILLAELEQLKGQGK	80.6	34.1	2	1539.91
						0.998	2	3	16	0.111	0.0579	KVESLQEEIAFLK	79.7	34.4	2	1533.85
Q9NYL9	Tropomodulin-3	IPI00005087	ipi.HUMAN.v3.68.fasta	39578.1	85	1	3	3	5	0.0417	0.122	FGYQFTQQGPR	42.4	34.8	2	1328.64
						1	3	3	5	0.0417	0.122	ILPVFDEPPNPTNVEESLKR	46.4	32.7	2	2294.2
						1	3	3	5	0.0417	0.122	NIPIPTLKDFAK	25.9	34.9	2	1356.79
P53396	ATP-citrate synthase	IPI00021290,IPI00394838,IPI00939422	ipi.HUMAN.v3.68.fasta	120825	225	1	5	5	6	0.0308	0.0681	DYQGPLKEHEVTIFVR	50.3	33.5	2	1931
						1	5	5	6	0.0308	0.0681	EAYPEEAYIADLDAK	42	33.9	2	1697.79
						1	5	5	6	0.0308	0.0681	IGNTGGMLDNILASK	69	34.5	2	1519.78
						1	5	5	6	0.0308	0.0681	SGGMSNELNNIISR	66.8	34.5	2	1491.72
						1	5	5	6	0.0308	0.0681	TIAIIAEGIPEALTR	62.8	34.2	2	1567.91
P55072	Transitional endoplasmic reticulum ATPase	IPI00022774	ipi.HUMAN.v3.68.fasta	89306.8	42	0.998	2	2	2	0.0101	0.0471	LIVDEAINEDNSVVSLSQPK	37.3	32.5	2	2170.12
						0.998	2	2	2	0.0101	0.0471	NAPAIIFIDELDAIAPKR	46.2	33.2	2	1967.1
Q08J23	tRNA (cytosine-5-)-methyl transferase NSUN2	IPI00306369	ipi.HUMAN.v3.68.fasta	86454.8	78	0.998	2	2	2	0.0101	0.0352	ILLTQENPFFR	53.2	34.7	2	1377.75
						0.998	2	2	2	0.0101	0.0352	LAQEGIYTLYPFINSR	49	33.3	2	1884.99
P06576	ATP synthase subunit alpha, mitochondrial	IPI00440493	ipi.HUMAN.v3.68.fasta	59734.1	158	1	7	8	8	0.0308	0.203	EVAAFAQFGSDLDAATQQLLSR	88.8	32.3	2	2338.17
						1	7	8	8	0.0308	0.203	GIRPAINVGLSVSR	44	34.4	2	1438.85
						1	7	8	8	0.0308	0.203	ILGADTSVDLEETGR	78.8	34.1	2	1575.79
						1	7	8	8	0.0308	0.203	LKEIVTNFLAGFEA	42.3	34.2	2	1551.84
						1	7	8	8	0.0308	0.203	TGAIVDVPVGEELLGR	46	34.1	2	1624.89
						1	7	8	8	0.0308	0.203	TSIAIDTIINQKR	84.8	34.3	2	1472.84
						1	7	8	8	0.0308	0.203	VVDALGNAIDGKGPIGSK	57.6	34.1	2	1710.94
P60842	Eukaryotic initiation factor 4A-I	IPI00025491	ipi.HUMAN.v3.68.fasta	46137.3	169	1	3	3	5	0.0216	0.101	GFKDQIYDIFQK	43.5	34.3	2	1501.77
						1	3	3	5	0.0216	0.101	GIYAYGFEKPSAIQQR	65.9	33.6	2	1827.94
						1	3	3	5	0.0216	0.101	MFVLDEADEMLSR	71.2	34.4	2	1555.71
P55786	Puromycin-sensitive aminopeptidase	IPI00026216	ipi.HUMAN.v3.68.fasta	103261	117	1	3	3	3	0.0151	0.0457	LGLQNDLFSLAR	71	35.2	2	1346.74
						1	3	3	3	0.0151	0.0457	LGWDPKPGEGHLDALLR	65.9	33.4	2	1873.99
						1	3	3	3	0.0151	0.0457	VLGATLLPDLIQK	55.3	34.7	2	1380.85
P50395	Rab GDP dissociation inhibitor beta	IPI00031461,IPI00645255,IPI00940148	ipi.HUMAN.v3.68.fasta	51138.5	78	1	3	3	3	0.0129	0.129	KFDLGQDVIDFTGHALALYR	48.8	32.3	2	2279.18
						1	3	3	3	0.0129	0.129	SPYLYPLYGLGELPQGFAR	54	33.1	2	2141.11
						1	3	3	3	0.0129	0.129	VPSTEAEALASSLMGLFEK	58	33.1	2	1980
P42330	Aldo-keto reductase family 1 member C3	IPI00291483,IPI00909541	ipi.HUMAN.v3.68.fasta	36827.1	35	0.995	2	2	2	0.00926	0.127	HIDSAHLYNNEEQVGLAIR	49.2	32.5	2	2179.09
						0.995	2	2	2	0.00926	0.127	LNDGHFMPVLGFGTYAPPEVPR	31.5	32.1	2	2430.19
P63244	Guanine nucleotide-binding protein subunit beta-2-like 1	IPI00848226	ipi.HUMAN.v3.68.fasta	35058.9	112	0.998	2	3	3	0.0161	0.0883	DVLSVAFSSDNR	44.3	34.8	2	1309.64
						0.998	2	3	3	0.0161	0.0883	IIVDELKQEVISTSSK	90.3	33.6	2	1789
P61289	Proteasome activator complex subunit 3, isoform 1	IPI00030243,IPI00219445	ipi.HUMAN.v3.68.fasta	29489.3	77	0.998	2	2	2	0.0108	0.118	ITSEAEDLVANFFPK	33.4	34.1	2	1680.85
						0.998	2	2	2	0.0108	0.118	TVESEAASYLDQISR	78.6	33.7	2	1668.81
P09211	Glutathione S-transferase P	IPI00219757	ipi.HUMAN.v3.68.fasta	23338.7	56	1	5	5	26	0.182	0.238	ALPGQLKPFETLLSQNQGGK	36.1	33	2	2126.16
						1	5	5	26	0.182	0.238	FQDGDLTLYQSNTILR	82.8	33.5	2	1883.95
						1	5	5	26	0.182	0.238	MPPYTVVYFPVR	42.1	34.2	2	1468.77
						1	5	5	26	0.182	0.238	PPYTVVYFPVR	52.1	34.5	1	1337.73
						1	5	5	26	0.182	0.238	PPYTVVYFPVRGR	28.2	34.5	1	1550.85
P13639	Elongation factor 2	IPI00186290,IPI00909570	ipi.HUMAN.v3.68.fasta	95322.1	240	1	5	5	7	0.0352	0.101	ALLELQLEPEELYQTFQR	48.3	32.7	2	2220.16
						1	5	5	7	0.0352	0.101	ARPFPDGLAEDIDKGEVSAR	61.3	32.5	2	2143.08
						1	5	5	7	0.0352	0.101	AYLPVNESFGFTADLR	87.8	33.3	2	1799.9
						1	5	5	7	0.0352	0.101	STAISLFYELSENDLNFIK	32	32.8	2	2204.11
						1	5	5	7	0.0352	0.101	YLAEKYEWDVAEAR	65.3	33	2	1742.84
Q15029	116 kDa U5 small nuclear ribonucleoprotein component	IPI00003519,IPI00917777	ipi.HUMAN.v3.68.fasta	109420	130	1	5	5	6	0.0308	0.0761	GLAEDIENEVVQITWNR	51.8	33.3	2	1985.99
						1	5	5	6	0.0308	0.0761	IAVEPVNPSELPK	41.1	34.5	2	1392.77
						1	5	5	6	0.0308	0.0761	ILAQVVGDVDTSLPR	69.4	33.9	2	1582.88
						1	5	5	6	0.0308	0.0761	SFVEFILEPLYK	42.3	34.7	2	1484.8
						1	5	5	6	0.0308	0.0761	SIVIRPLEPQPAPHLAR	19.3	33.4	2	1894.1
P10696	Alkaline phosphatase, placental-like	IPI00290380	ipi.HUMAN.v3.68.fasta	57359.8	140	1	5	5	6	0.0349	0.158	ALTETIMFDDAIER	45	33.9	2	1640.78
						1	5	5	6	0.0349	0.158	AYTVLLYGNGPGYVLK	33.8	33.6	2	1727.94
						1	5	5	6	0.0349	0.158	NLIIFLGDGMGVSTVTAAR	26.2	33.3	2	1951.03
						1	5	5	6	0.0349	0.158	NWYSDADVPASAR	40.9	34.3	2	1451.66
						1	5	5	6	0.0349	0.158	QQSAVPLDGETHAGEDVAVFAR	56.8	32.2	2	2297.12
Q99714	3-hydroxyacyl-CoA dehydrogenase type-2, isoform 1	IPI00017726,IPI00336094,IPI00639797	ipi.HUMAN.v3.68.fasta	26905.1	108	0.998	2	2	2	0.0132	0.165	GLVAVITGGASGLGLATAER	88	33.4	2	1813.02
						0.998	2	2	2	0.0132	0.165	LVGQGASAVLLDLPNSGGEAQAK	49.7	32.6	2	2195.17
Q08211	ATP-dependent RNA helicase A	IPI00844578	ipi.HUMAN.v3.68.fasta	140944	264	1	6	6	9	0.0359	0.0732	AENNSEVGASGYGVPGPTWDR	72.4	32.5	2	2162.97
						1	6	6	9	0.0359	0.0732	GMTLVTPLQLLLFASK	69.6	33.7	2	1748
						1	6	6	9	0.0359	0.0732	LGGIGQFLAK	27.1	35.8	2	1003.59
						1	6	6	9	0.0359	0.0732	QISRPSAAGINLMIGSTR	35.5	33.7	2	1872.01
						1	6	6	9	0.0359	0.0732	TPLHEIALSIK	27.7	35.4	2	1221.72
						1	6	6	9	0.0359	0.0732	TTQVPQFILDDFIQNDR	46.4	32.9	2	2050.02
P41252	Isoleucyl-tRNA synthetase, cytoplasmic	IPI00644127,IPI00910980	ipi.HUMAN.v3.68.fasta	144484	94	1	5	7	7	0.0279	0.0547	APLKPYPVSPSDKVLIQEK	44.2	33	2	2109.2
						1	5	7	7	0.0279	0.0547	FVDILTNWYVR	49.6	34.6	2	1425.75
						1	5	7	7	0.0279	0.0547	ISDLHRESVDHLTIPSR	20.6	33.1	2	1975.04
						1	5	7	7	0.0279	0.0547	LYLINSPVVR	36.8	35.5	2	1173.7
						1	5	7	7	0.0279	0.0547	QLSSEELEQFQK	37.3	34.3	2	1465.72
P26640	Valyl-tRNA synthetase	IPI00000873,IPI00893918	ipi.HUMAN.v3.68.fasta	140460	78	0.985	2	2	2	0.00797	0.0285	LLSPFMPFVTEELFQR	25.1	32.9	2	1970.01
						0.985	2	2	2	0.00797	0.0285	SLPIVFDEFVDMDFGTGAVK	44.1	32.3	2	2203.06
Q13263	Transcription intermediary factor 1-beta, isoform 1	IPI00438229,IPI00438230	ipi.HUMAN.v3.68.fasta	88531	59	0.998	2	2	3	0.0151	0.0407	LSPPYSSPQEFAQDVGR	49.7	33.4	2	1877.9
						0.998	2	2	3	0.0151	0.0407	VFPGSTTEDYNLIVIER	43.4	33.1	2	1953
Q14974	Importin subunit beta-1	IPI00001639	ipi.HUMAN.v3.68.fasta	97153.3	84	0.995	2	2	2	0.0187	0.0342	AAVENLPTFLVELSR	31.8	33.7	2	1658.91
						0.995	2	2	2	0.0187	0.0342	LAATNALLNSLEFTK	84.3	33.9	2	1605.89
P26641	Elongation factor 1-gamma	IPI00000875,IPI00738381,IPI00909534,IPI00937615	ipi.HUMAN.v3.68.fasta	56132.9	65	0.998	2	2	2	0.00797	0.0411	ILGLLDAYLK	38	35.5	2	1118.68
						0.998	2	2	2	0.00797	0.0411	STFVLDEFKR	49.6	34.6	2	1241.65
P21796	Voltage-dependent anion-selective channel protein 1	IPI00216308,IPI00847300,IPI00910830	ipi.HUMAN.v3.68.fasta	30755.9	78	0.998	2	2	2	0.0114	0.134	LTLSALLDGKNVNAGGHK	41.4	33.9	2	1808
						0.998	2	2	2	0.0114	0.134	VNNSSLIGLGYTQTLKPGIK	54.5	32.7	2	2103.18
P61026	Ras-related protein Rab-1A, isoform 1	IPI00005719,IPI00008964,IPI00334174,IPI00374519,IPI00896425,IPI00917079,IPI00922662,IPI00937805	ipi.HUMAN.v3.68.fasta	22660.4	45	0.997	2	2	2	0.0345	0.161	EFADSLGIPFLETSAK	28.9	33.9	2	1724.87
						0.997	2	2	2	0.0345	0.161	NATNVEQSFMTMAAEIK	33.6	33.4	2	1884.88
Q00610	Clathrin heavy chain 1, isoform 1	IPI00024067,IPI00455383	ipi.HUMAN.v3.68.fasta	191601	36	0.996	3	3	3	0.012	0.0227	ALEHFTDLYDIKR	30.1	34	2	1620.84
						0.996	3	3	3	0.012	0.0227	SVDPTLALSVYLR	28.2	34.7	2	1433.8
						0.996	3	3	3	0.012	0.0227	VGYTPDWIFLLR	27.1	34.4	2	1479.8
Q14683	Structural maintenance of chromosomes protein 1A	IPI00291939	ipi.HUMAN.v3.68.fasta	143220	221	0.998	2	2	4	0.0159	0.0219	SKLESELANFGPR	62.5	34.7	2	1447.75
						0.998	2	2	4	0.0159	0.0219	SNLMDAISFVLGEK	79.6	34.1	2	1523.78
